# Supplementary material for: Selective alcohol adsorption in a uniformly ordered array of lipophilic mesopores by a giant macrocycle
Source: Royal Society of Chemistry journal article supplement (doi:10.1039/c3ra45716h), 2013-11-11
Supplement: c3ra45716h.pdf [file c3ra45716h.pdf]

Electronic Supplementary Information

# Selective Alcohol Adsorption in a Uniformly Ordered Array of Lipophilic Mesopores by a Giant Macrocycle

Takahisa Uchise,<sup>a</sup> Kenta Goto,<sup>\*a</sup> Aya Harano,<sup>a</sup> and Teruo Shinmyozu<sup>\*a</sup>

<sup>a</sup> Institute for Materials Chemistry and Engineering (IMCE) and Department of  
Chemistry, Graduate School of Sciences, Kyushu University, 6-10-1 Hakozaki,  
Higashi-ku, Fukuoka, 812-8581, Japan.

Tel.: +81 92 642 4350; fax: +81 92 642 2735; E-mail address: K.G. g2k@me.com and T.S.  
shinmyo@ms.ifoc.kyushu-u.ac.jp

## General

All reagents were reagent-grade and used without purification. Melting points were measured on a Yanaco MP-S3 melting point apparatus and are uncorrected. The  $^1\text{H}$  NMR spectra were recorded on a Jeol JNM-AL300 spectrometer, operating at 300 MHz. The  $^{13}\text{C}$  NMR spectra were measured on a Bruker DRX 600 spectrometer at a measurement frequency of 125 MHz. The chemical shifts are given in ppm downfield from the  $^1\text{H}$  and  $^{13}\text{C}$  signals of tetramethylsilane. IR spectra were recorded on a Nicolet Magna 720 FT-IR spectrometer. The FAB mass spectra were obtained on a Jeol JMS-70 mass spectrometer with *m*-nitrobenzyl alcohol as a matrix. Elemental analyses were performed at the Center of Elementary Analysis affiliated with Faculty of Science, Kyushu University. The X-ray powder diffraction data were collected on a Rigaku MultiFlex diffractometer over the  $2\theta$  range of 5–60° with using a copper radiation source.

## Synthesis

Preparation of macrocycle **1** was previously reported<sup>1</sup> and obtained as follows: Under Ar atmosphere, a solution of tris(2-aminoethyl)amine (0.029 g, 0.20 mmol) in dry MeOH (100 mL) and a solution of *trans*-[bis(4-formylphenylethynyl)bis(triethylphosphine)]platinum (0.21 g, 0.30 mmol) in dry  $\text{CH}_2\text{Cl}_2$  (100 mL) were simultaneously added to a mixture of solvent of MeOH (200 mL) and  $\text{CH}_2\text{Cl}_2$  (200 mL) at room temperature with stirring. After stirring for 2 days, the mixture was concentrated to the volume of one-half. The precipitate was filtered and used without further purification. Yield: 0.146 g (62%); Mp 217 °C (dec.);  $^1\text{H}$  NMR (300 MHz,  $\text{CDCl}_3$ ):  $\delta$  7.43 (s, 12H, CH=N), 7.19 (d,  $J = 8.4$  Hz, 24H, Ar-H), 6.72 (d,  $J = 8.4$  Hz, 24H, ArH), 3.46 (br, 24H,  $\text{CHNCH}_2\text{CH}_2$ ), 2.76 (br, 24H,  $\text{CHNCH}_2\text{CH}_2$ ), 2.06-2.24 (m, 72H,  $\text{PCH}_2$ ), 1.15-1.34 (m, 108H,  $\text{CH}_3$ );  $^{13}\text{C}$  NMR (125 MHz,  $\text{CDCl}_3$ ):  $\delta$  161.6 (s, C=N), 132.8 (Ph), 132.8 (Ph), 130.5 (Ph), 128.0 (Ph), 111.0 (t,  $^2J_{\text{PC}} = 15$  Hz,  $\text{PtC}\equiv\text{C}$ ), 110.5 ( $\text{PtC}\equiv\text{C}$ ), 59.9 ( $\text{NCH}_2$ ), 56.8 ( $\text{NCH}_2$ ), 16.5 (t,  $^1J_{\text{PC}} = 17$  Hz,  $\text{PCH}_2$ ), 8.52 (s,  $\text{CH}_3$ ); IR (KBr):  $\nu_{\text{max}}$  1640 ( $\nu\text{C}=\text{N}$ ), 2110 ( $\nu\text{C}\equiv\text{C}$ )  $\text{cm}^{-1}$ ; FABMS  $m/z$ : 4505.78 ( $[\text{M}^+]$ ,  $\text{C}_{204}\text{H}_{288}\text{N}_{16}\text{P}_{12}\text{Pt}_6$ ); Anal. Calcd for  $\text{C}_{204}\text{H}_{288}\text{N}_{16}\text{P}_{12}\text{Pt}_6$ : C, 54.37; H, 6.44; N, 4.97; Found: C, 54.18; H, 6.43; N, 5.00.

## Gas sorption

Nitrogen gas and alcohol sorption of **1** was performed on an automatic volume

adsorption apparatus (Bel Belsorp-18-plus). Prior to measurement, macrocycle **1** was dried at 70 °C for 7 h under reduced pressure of  $3 \times 10^{-4}$  kPa, then gradually cooled to 30 °C. The dried sample and sample tube were weighed precisely and transferred to the analyzer. The sorption isotherms were collected in a relative pressure range from 0.002 to 0.95. For nitrogen sorption of **1**, liquid nitrogen bath was used for controlling the temperature at 77 K. All of the measurements were analyzed with a Belmaster (ver. 5.3.5.2) implemented in the apparatus. The specific surface area and pore size distribution were obtained by the Brunauer-Emmet-Teller (BET) method<sup>2</sup> and the Cranston-Inkley (CI) method<sup>3</sup> using nitrogen gas sorption. The isosteric heat of sorption for alcohol was obtained by the Clausius-Clapeyron equation<sup>4</sup> using alcohol isotherms at 228 K and 308 K.

## References

- 1 A. Harano, M. Tanaka, T. Nakagaki, M. Annaka, K. Ideta, K. Goto and T. Shinmyozu, *Org. Biomol. Chem.*, **2011**, *9*, 3611-3614.
- 2 S. Brunauer, P. H. Emmett, and E. Teller, *J. Am. Chem. Soc.*, **1938**, *60*, 309-319.
- 3 R. W. Cranston and F. A. Inkley, *Adv. in Catal.* **1957**, *9*, 143-154.
- 4 H. Pan, J. A. Ritter, and P. B. Balbuena, *Langmuir* **1998**, *14*, 6323-6327.

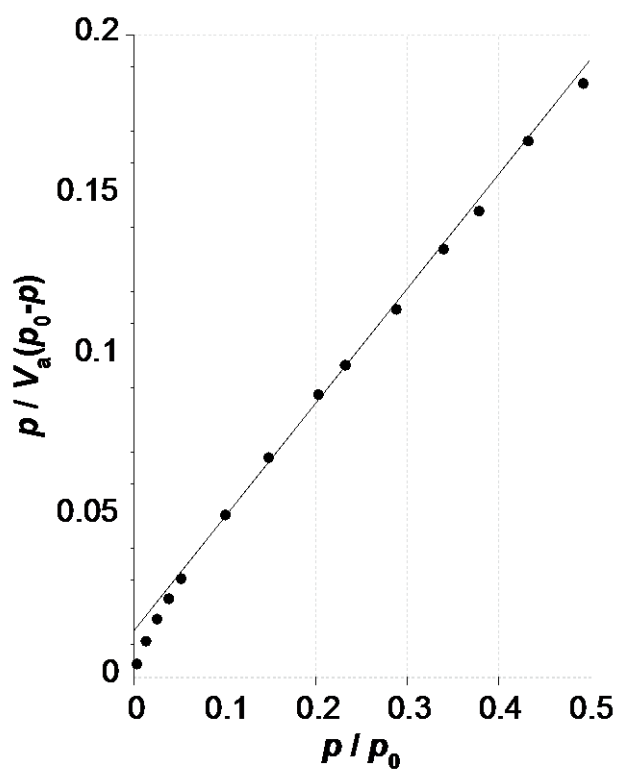

**Fig. S1.** BET plot nitrogen gas calculated from adsorption of **1** at 77 K. Linear line was obtained by least square method using data, where relative pressure is in the range of 0.052–0.288.
